# Supplementary material
Source: PubMed Central journal article supplement (PMC7127491)
Supplement: mmc1.pdf [file mmc1.pdf]

Elemental analyses for compounds **IIa**, **IIb** and **1-14**

| Compd      | Formula                | Elem. anal. data                |                                 |
|------------|------------------------|---------------------------------|---------------------------------|
|            |                        | Calcd. (%)                      | Found (%)                       |
| <b>IIa</b> | $C_{16}H_{12}IN_3O_4$  | C, 43.96<br>H, 2.77<br>N, 9.61  | C, 44.04<br>H, 2.77<br>N, 9.64  |
| <b>IIb</b> | $C_{16}H_{12}IN_3O_4$  | C, 43.96<br>H, 2.77<br>N, 9.61  | C, 43.88<br>H, 2.76<br>N, 9.59  |
| <b>1</b>   | $C_{22}H_{21}N_3O_4$   | C, 67.51<br>H, 5.41<br>N, 10.74 | C, 67.36<br>H, 5.42<br>N, 10.77 |
| <b>2</b>   | $C_{26}H_{29}N_3O_4$   | C, 69.78<br>H, 6.53<br>N, 9.39  | C, 69.61<br>H, 6.54<br>N, 9.40  |
| <b>3</b>   | $C_{26}H_{21}N_3O_4$   | C, 71.06<br>H, 4.82<br>N, 9.56  | C, 70.89<br>H, 4.82<br>N, 9.58  |
| <b>4</b>   | $C_{24}H_{16}BrN_3O_4$ | C, 58.79<br>H, 3.29<br>N, 8.57  | C, 58.70<br>H, 3.30<br>N, 8.59  |
| <b>5</b>   | $C_{25}H_{19}N_3O_4$   | C, 70.58<br>H, 4.50<br>N, 9.88  | C, 70.36<br>H, 4.49<br>N, 9.90  |
| <b>6</b>   | $C_{28}H_{25}N_3O_4$   | C, 71.93<br>H, 5.39<br>N, 8.99  | C, 72.12<br>H, 5.38<br>N, 9.00  |
| <b>7</b>   | $C_{29}H_{27}N_3O_4$   | C, 72.33<br>H, 5.65<br>N, 8.73  | C, 72.55<br>H, 5.64<br>N, 8.73  |
| <b>8</b>   | $C_{22}H_{21}N_3O_4$   | C, 67.51<br>H, 5.41<br>N, 10.74 | C, 67.64<br>H, 5.40<br>N, 10.75 |
| <b>9</b>   | $C_{23}H_{23}N_3O_4$   | C, 68.13<br>H, 5.72<br>N, 10.36 | C, 68.20<br>H, 5.73<br>N, 10.39 |
| <b>10</b>  | $C_{24}H_{25}N_3O_4$   | C, 68.72<br>H, 6.01<br>N, 10.02 | C, 68.55<br>H, 6.00<br>N, 10.00 |
| <b>11</b>  | $C_{26}H_{29}N_3O_4$   | C, 69.78<br>H, 6.53<br>N, 9.39  | C, 69.69<br>H, 6.53<br>N, 9.41  |
| <b>12</b>  | $C_{26}H_{21}N_3O_4$   | C, 71.06<br>H, 4.82<br>N, 9.56  | C, 70.98<br>H, 4.81<br>N, 9.57  |
| <b>13</b>  | $C_{28}H_{25}N_3O_4$   | C, 71.93<br>H, 5.39<br>N, 8.99  | C, 72.06<br>H, 5.40<br>N, 9.01  |
| <b>14</b>  | $C_{29}H_{27}N_3O_4$   | C, 72.33<br>H, 5.65<br>N, 8.73  | C, 72.14<br>H, 5.66<br>N, 8.72  |
